# Supplementary material for: Is Atrial Fibrillation Noninducibility by Burst Pacing After Catheter Ablation Associated With Reduced Clinical Recurrence? A Systematic Review and Meta‐Analysis
Source: PubMed Central journal article supplement — J Am Heart Assoc. 2020 Jul 11;9(14):e015260. doi: 10.1161/JAHA.119.015260 (PMC7660710; doi:10.1161/jaha.119.015260), 2020-07-11
Supplement: JAH3-9-e015260-s001.pdf [file JAH3-9-e015260-s001.pdf]

# **Supplemental Material**

## **Data S1.**

### **Used search terms:**

(Mesh exp “Atrial Fibrillation” and key words “atrial fibrillation”, “atrial fibrillations”, “paroxysmal atrial fibrillation”, “paroxysmal atrial fibrillations”, “persistent atrial fibrillation”, “persistent atrial fibrillations” or “long-standing persistent atrial fibrillation”), (Mesh exp “Catheter Ablation”, and key words “catheter ablation”, “transvenous catheter ablation”, “radiofrequency ablation”, “radio-frequency ablation”, “ablation”, “circumferential pulmonary vein isolation”, or “pulmonary vein isolation”), “(Mesh exp “Non-inducibility”, “Inducibility” and key words “non-inducibility”, “noninducibility”, “non inducibility”, “not inducible”, “inducibility”, “inducible”, “induction”, or “induce”), and (Mesh exp “Recurrence”, “Prognosis” and key words “recurrence”, “recurrences”, “freedom from AF”, “freedom from arrhythmia”, “freedom from arrhythmias”, “prognosis”, “prognostic factor”, “prognostic factors”, “prognostic significance”, “clinical value”, “outcome”, “outcomes”, “clinical outcomes”, “arrhythmias-free outcome” or “arrhythmia-free outcome”).

**Table S1. Quality assessment according to the Newcastle-Ottawa scale for nonrandomized studies.**

| <b>Studies</b>                 | <b>Selection</b> | <b>Comparability</b> | <b>Outcome</b> | <b>Total score</b> |
|--------------------------------|------------------|----------------------|----------------|--------------------|
| Kawai-2019 <sup>10</sup>       | ****             | *                    | ***            | 8                  |
| Skala-2019 <sup>13</sup>       | ****             | **                   | ***            | 9                  |
| Otsuka-2018 <sup>8</sup>       | ****             | *                    | ***            | 8                  |
| Santangeli-2018 <sup>12</sup>  | ****             | *                    | ***            | 8                  |
| Leong-Sit-2013 <sup>11</sup>   | ****             | *                    | ***            | 8                  |
| Adlbrecht-2013 <sup>21</sup>   | ****             | *                    | ***            | 8                  |
| Liu-2012 <sup>7</sup>          | ****             | *                    | ***            | 8                  |
| Satomi-2008 <sup>14</sup>      | ****             | *                    | ***            | 8                  |
| Chang-2007 <sup>5</sup>        | ****             |                      | ***            | 7                  |
| Richter -2006 <sup>22</sup>    | ****             | **                   | ***            | 9                  |
| Haïssaguerre-2004 <sup>6</sup> | ****             |                      | ***            | 7                  |
| Oral-2004 <sup>4</sup>         | ****             | **                   | ***            | 9                  |

Average score: 8.08

## Table S2. GRADE rating of the quality of evidence.

Author(s):

Question: AF non-inducibility compared to AF inducibility

Setting:

Bibliography:

| Certainty assessment |              |              |               |              |             |                      | № of patients       |                 | Effect            |                   | Certainty | Importance |
|----------------------|--------------|--------------|---------------|--------------|-------------|----------------------|---------------------|-----------------|-------------------|-------------------|-----------|------------|
| № of studies         | Study design | Risk of bias | Inconsistency | Indirectness | Imprecision | Other considerations | AF non-inducibility | AF inducibility | Relative (95% CI) | Absolute (95% CI) |           |            |

### AF recurrence rate (follow up: range 5 months to 42.5 months)

|    |                       |             |             |             |             |                    |                  |                  |                           |                                                  |                      |  |
|----|-----------------------|-------------|-------------|-------------|-------------|--------------------|------------------|------------------|---------------------------|--------------------------------------------------|----------------------|--|
| 12 | observational studies | not serious | not serious | not serious | not serious | strong association | 400/1612 (24.8%) | 373/1160 (32.2%) | RR 0.68<br>(0.60 to 0.77) | 103 fewer per 1,000 (from 129 fewer to 74 fewer) | ⊕⊕⊕<br>○<br>MODERATE |  |
|----|-----------------------|-------------|-------------|-------------|-------------|--------------------|------------------|------------------|---------------------------|--------------------------------------------------|----------------------|--|

### PAF associated with AF recurrence rate (follow up: range 5 months to 42.5 months)

|    |                       |             |             |             |             |                    |                  |                 |                           |                                                  |                      |  |
|----|-----------------------|-------------|-------------|-------------|-------------|--------------------|------------------|-----------------|---------------------------|--------------------------------------------------|----------------------|--|
| 10 | observational studies | not serious | not serious | not serious | not serious | strong association | 297/1344 (22.1%) | 257/910 (28.2%) | RR 0.64<br>(0.55 to 0.75) | 102 fewer per 1,000 (from 127 fewer to 71 fewer) | ⊕⊕⊕<br>○<br>MODERATE |  |
|----|-----------------------|-------------|-------------|-------------|-------------|--------------------|------------------|-----------------|---------------------------|--------------------------------------------------|----------------------|--|

### Non-AF associated with AF recurrence (follow up: range 5 months to 42.5 months)

|   |                       |             |             |             |             |      |                |                |                           |                                                  |                 |  |
|---|-----------------------|-------------|-------------|-------------|-------------|------|----------------|----------------|---------------------------|--------------------------------------------------|-----------------|--|
| 4 | observational studies | not serious | not serious | not serious | not serious | none | 76/213 (35.7%) | 72/161 (44.7%) | RR 0.75<br>(0.59 to 0.96) | 112 fewer per 1,000 (from 183 fewer to 18 fewer) | ⊕⊕○<br>○<br>LOW |  |
|---|-----------------------|-------------|-------------|-------------|-------------|------|----------------|----------------|---------------------------|--------------------------------------------------|-----------------|--|

### Follow up less than 6 months associated with AF recurrence rate (follow up: mean 5 months)

|   |                       |             |             |             |             |      |                |                |                           |                                                  |                 |  |
|---|-----------------------|-------------|-------------|-------------|-------------|------|----------------|----------------|---------------------------|--------------------------------------------------|-----------------|--|
| 2 | observational studies | not serious | not serious | not serious | not serious | none | 51/108 (47.2%) | 58/226 (25.7%) | RR 0.55<br>(0.41 to 0.74) | 115 fewer per 1,000 (from 151 fewer to 67 fewer) | ⊕⊕○<br>○<br>LOW |  |
|---|-----------------------|-------------|-------------|-------------|-------------|------|----------------|----------------|---------------------------|--------------------------------------------------|-----------------|--|

### Follow up between 6 months to 12 months associated with AF recurrence (follow up: range 6 months to 12 months)

|   |                       |             |             |             |             |                    |                 |                  |                           |                                                |                      |  |
|---|-----------------------|-------------|-------------|-------------|-------------|--------------------|-----------------|------------------|---------------------------|------------------------------------------------|----------------------|--|
| 8 | observational studies | not serious | not serious | not serious | not serious | strong association | 296/956 (31.0%) | 235/1041 (22.6%) | RR 0.67<br>(0.58 to 0.77) | 74 fewer per 1,000 (from 95 fewer to 52 fewer) | ⊕⊕⊕<br>○<br>MODERATE |  |
|---|-----------------------|-------------|-------------|-------------|-------------|--------------------|-----------------|------------------|---------------------------|------------------------------------------------|----------------------|--|

### Follow up longer than 12 months associated with AF recurrence rate (follow up: range 12 months to 42.5 months)

| Certainty assessment |                       |              |               |              |             |                      | № of patients       |                 | Effect                    |                                                           | Certainty       | Importance |
|----------------------|-----------------------|--------------|---------------|--------------|-------------|----------------------|---------------------|-----------------|---------------------------|-----------------------------------------------------------|-----------------|------------|
| № of studies         | Study design          | Risk of bias | Inconsistency | Indirectness | Imprecision | Other considerations | AF non-inducibility | AF inducibility | Relative (95% CI)         | Absolute (95% CI)                                         |                 |            |
| 4                    | observational studies | not serious  | not serious   | not serious  | not serious | none                 | 91/226 (40.3%)      | 169/551 (30.7%) | RR 0.73<br>(0.60 to 0.89) | <b>83 fewer per 1,000</b><br>(from 123 fewer to 34 fewer) | ⊕⊕○<br>○<br>LOW |            |

Cut-off time 1 minute associated with AF recurrence rate (follow up: range 6 months to 12 months)

|   |                       |             |             |             |             |                    |                 |                 |                           |                                                            |                      |  |
|---|-----------------------|-------------|-------------|-------------|-------------|--------------------|-----------------|-----------------|---------------------------|------------------------------------------------------------|----------------------|--|
| 5 | observational studies | not serious | not serious | not serious | not serious | strong association | 100/179 (55.9%) | 126/434 (29.0%) | RR 0.54<br>(0.45 to 0.66) | <b>134 fewer per 1,000</b><br>(from 160 fewer to 99 fewer) | ⊕⊕⊕<br>○<br>MODERATE |  |
|---|-----------------------|-------------|-------------|-------------|-------------|--------------------|-----------------|-----------------|---------------------------|------------------------------------------------------------|----------------------|--|

Cut-off time 2 minutes associated with AF recurrence rate (follow up: range 12 months to 19 months)

|   |                       |             |             |             |             |      |                |                |                           |                                                         |                 |  |
|---|-----------------------|-------------|-------------|-------------|-------------|------|----------------|----------------|---------------------------|---------------------------------------------------------|-----------------|--|
| 2 | observational studies | not serious | not serious | not serious | not serious | none | 81/207 (39.1%) | 72/242 (29.8%) | RR 0.86<br>(0.67 to 1.11) | <b>42 fewer per 1,000</b><br>(from 98 fewer to 33 more) | ⊕⊕○<br>○<br>LOW |  |
|---|-----------------------|-------------|-------------|-------------|-------------|------|----------------|----------------|---------------------------|---------------------------------------------------------|-----------------|--|

Cut-off time 5-10 minutes associated with AF recurrence rate (follow up: range 12 months to 42.5 months)

|   |                       |             |             |             |             |      |                |                 |                           |                                                         |                 |  |
|---|-----------------------|-------------|-------------|-------------|-------------|------|----------------|-----------------|---------------------------|---------------------------------------------------------|-----------------|--|
| 4 | observational studies | not serious | not serious | not serious | not serious | none | 50/133 (37.6%) | 128/436 (29.4%) | RR 0.77<br>(0.58 to 1.01) | <b>68 fewer per 1,000</b><br>(from 123 fewer to 3 more) | ⊕⊕○<br>○<br>LOW |  |
|---|-----------------------|-------------|-------------|-------------|-------------|------|----------------|-----------------|---------------------------|---------------------------------------------------------|-----------------|--|

Mild stimulation associated with AF recurrence rate (follow up: range 12 months to 19 months)

|   |                       |             |             |             |             |      |                |                |                           |                                                         |                 |  |
|---|-----------------------|-------------|-------------|-------------|-------------|------|----------------|----------------|---------------------------|---------------------------------------------------------|-----------------|--|
| 2 | observational studies | not serious | not serious | not serious | not serious | none | 81/207 (39.1%) | 72/242 (29.8%) | RR 0.86<br>(0.67 to 1.11) | <b>42 fewer per 1,000</b><br>(from 98 fewer to 33 more) | ⊕⊕○<br>○<br>LOW |  |
|---|-----------------------|-------------|-------------|-------------|-------------|------|----------------|----------------|---------------------------|---------------------------------------------------------|-----------------|--|

Moderate stimulation associated with AF recurrence rate (follow up: range 12 months to 42.5 months)

|   |                       |             |             |             |             |      |                 |                 |                           |                                                            |                 |  |
|---|-----------------------|-------------|-------------|-------------|-------------|------|-----------------|-----------------|---------------------------|------------------------------------------------------------|-----------------|--|
| 6 | observational studies | not serious | not serious | not serious | not serious | none | 127/254 (50.0%) | 212/680 (31.2%) | RR 0.63<br>(0.53 to 0.74) | <b>115 fewer per 1,000</b><br>(from 147 fewer to 81 fewer) | ⊕⊕○<br>○<br>LOW |  |
|---|-----------------------|-------------|-------------|-------------|-------------|------|-----------------|-----------------|---------------------------|------------------------------------------------------------|-----------------|--|

Severe stimulation associated with AF recurrence rate (follow up: range 6 months to 16 months)

| Certainty assessment |                       |              |               |              |             |                      | № of patients       |                 | Effect                           |                                                           | Certainty       | Importance |
|----------------------|-----------------------|--------------|---------------|--------------|-------------|----------------------|---------------------|-----------------|----------------------------------|-----------------------------------------------------------|-----------------|------------|
| № of studies         | Study design          | Risk of bias | Inconsistency | Indirectness | Imprecision | Other considerations | AF non-inducibility | AF inducibility | Relative (95% CI)                | Absolute (95% CI)                                         |                 |            |
| 3                    | observational studies | not serious  | not serious   | not serious  | not serious | none                 | 23/58 (39.7%)       | 42/190 (22.1%)  | <b>RR 0.57</b><br>(0.38 to 0.86) | <b>95 fewer per 1,000</b><br>(from 137 fewer to 31 fewer) | ⊕⊕○<br>○<br>LOW |            |

CI: Confidence interval; RR: Risk ratio

**Figure S1. Sensitivity of the outcome (recurrence of AF).**

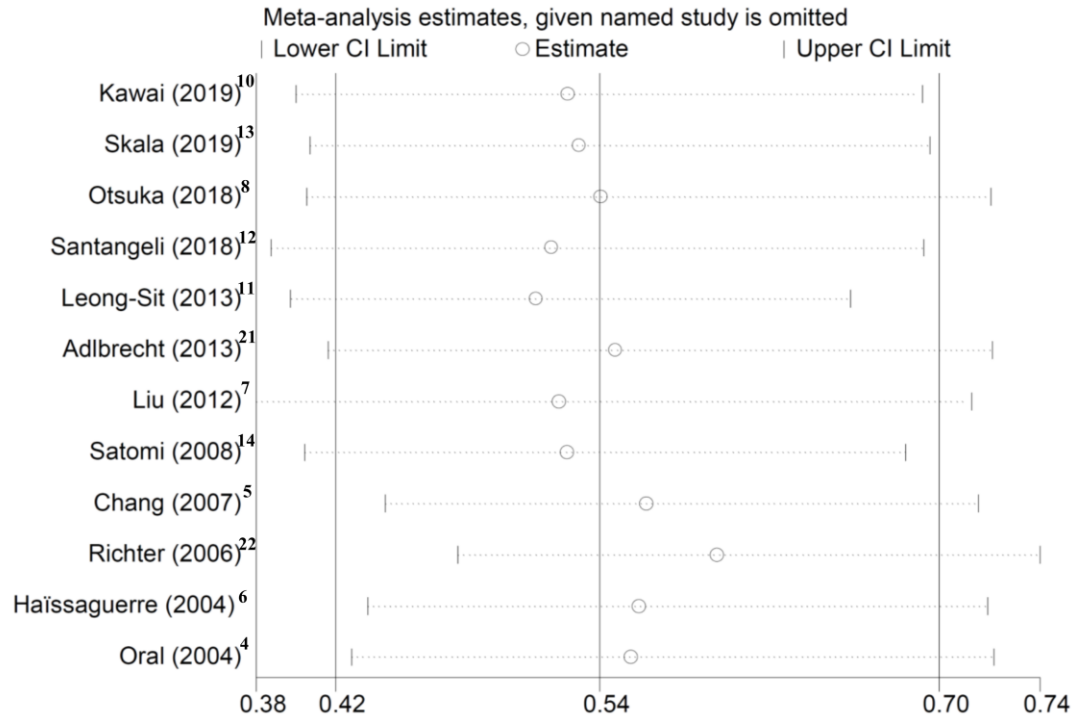

**Figure S2. (random effects models) AF non-inducibility vs AF inducibility by burst pacing after catheter ablation on the recurrence of AF in total patients.**

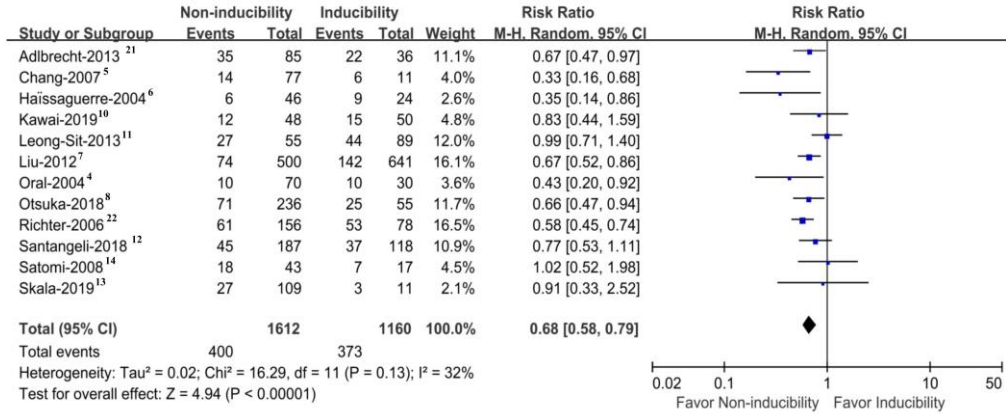



**Figure S3. (random effects models) AF non-inducibility vs AF inducibility by burst pacing after catheter ablation on the recurrence of AF in different AF type and follow-up time.**

**A**

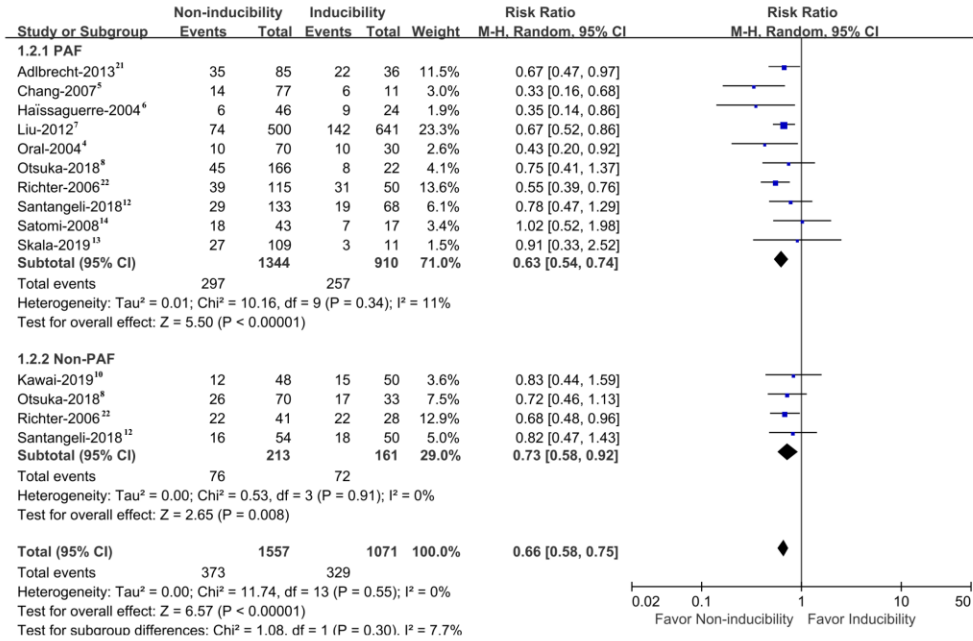

**B**

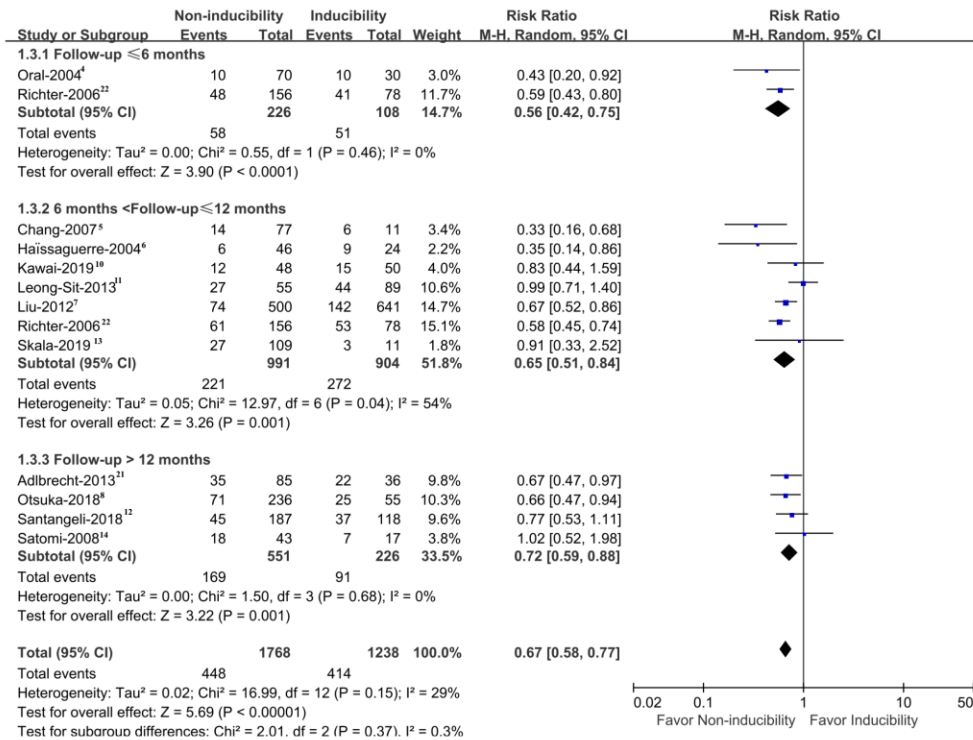

PAF: paroxysmal AF; Non-PAF: non-paroxysmal AF.

**Figure S4. (random effects models) AF non-inducibility vs AF inducibility by burst pacing after catheter ablation on the recurrence of AF in different induction protocols.**

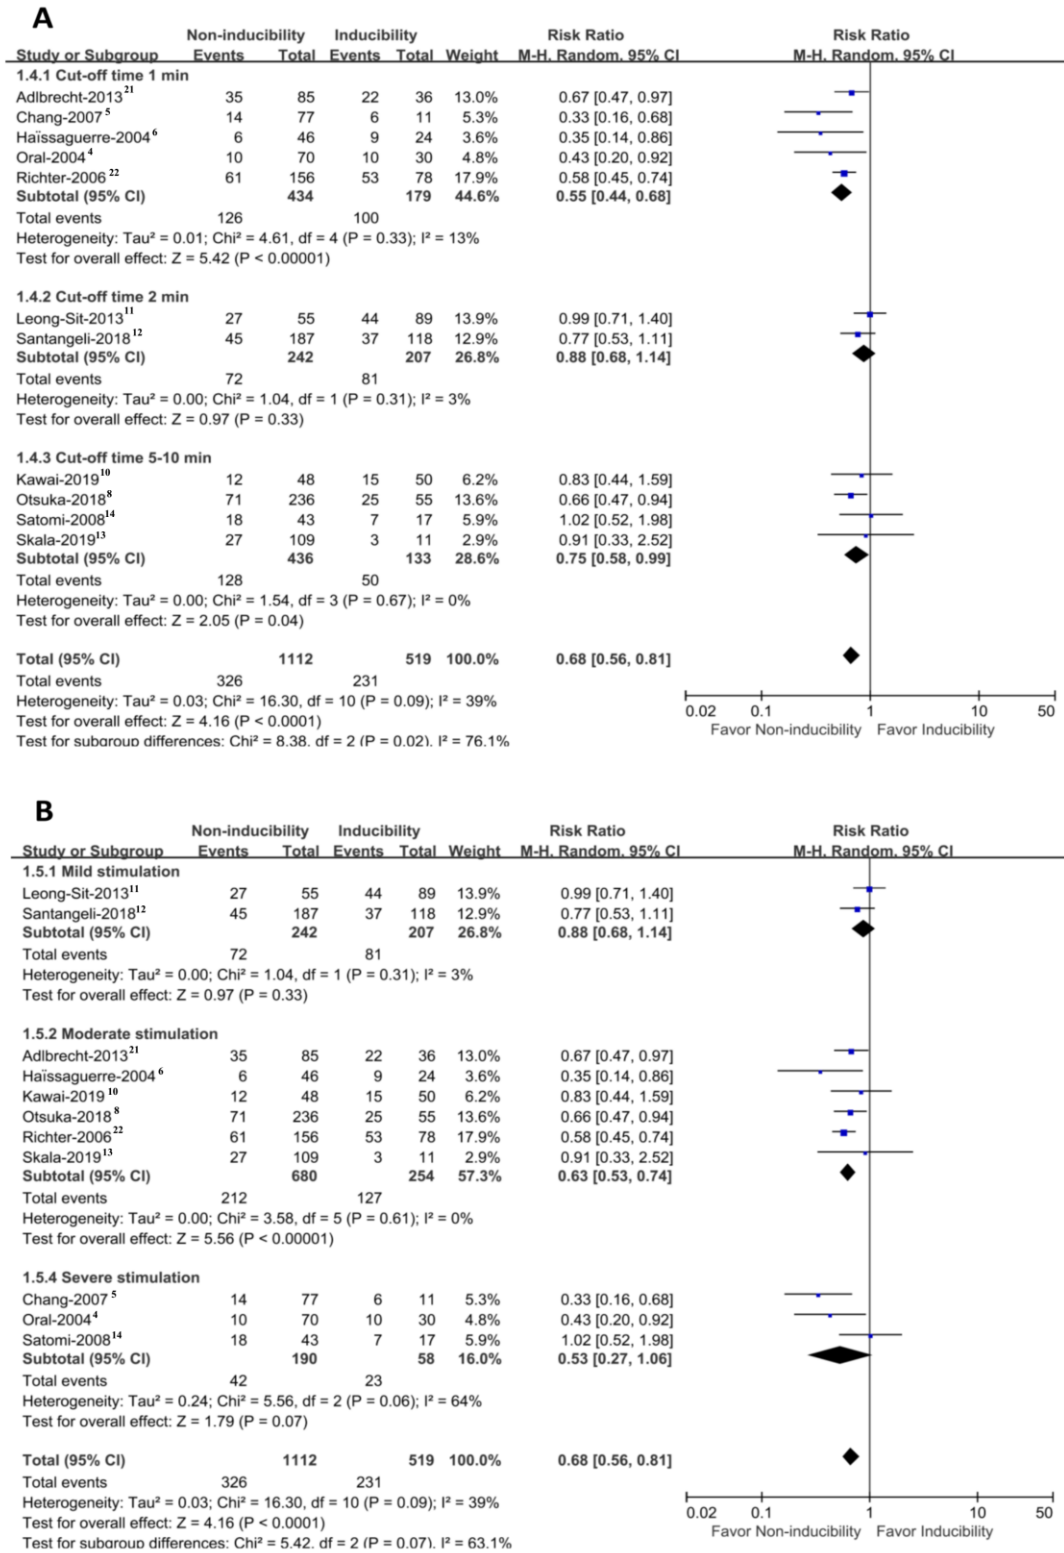

Mild stimulation: burst pacing to refractoriness, 2:1 atrial capture, or 180-200 ms (maintaining  $\leq 3$  sec/15 beats); Moderate stimulation: burst pacing to refractoriness, or 180-200 ms (maintaining 5 sec/30 beats); Severe stimulation: burst pacing to refractoriness (maintaining  $\geq 10$  sec), or 150 ms (maintaining 5-10 sec).
